# Supplementary figures and images for: Small-molecule activation of TFEB alleviates Niemann–Pick disease type C via promoting lysosomal exocytosis and biogenesis
Source: eLife journal article supplement (doi:10.7554/elife.103137), 2024-12-03

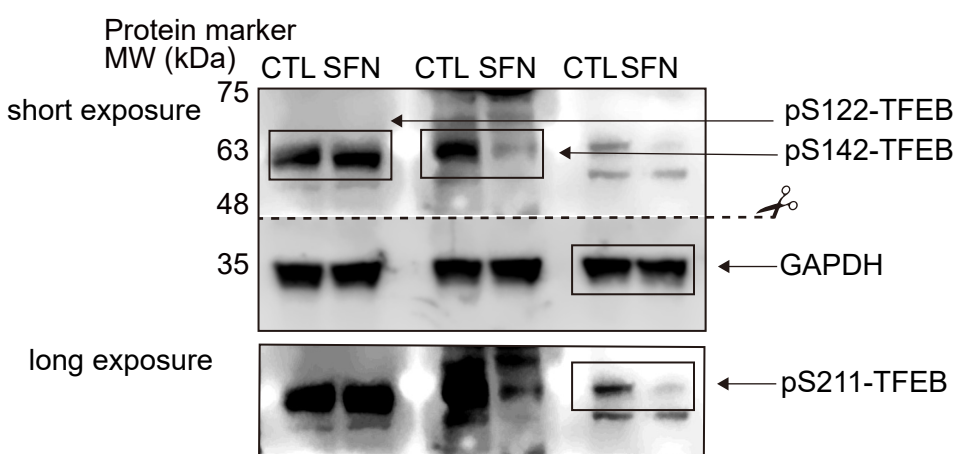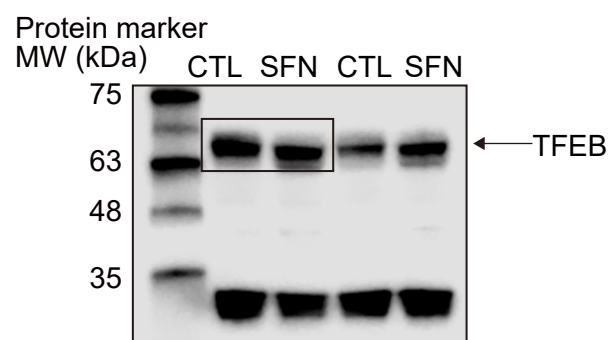

Supplement: fig1-data1 [file elife-103137-fig1-data1-v1.zip]

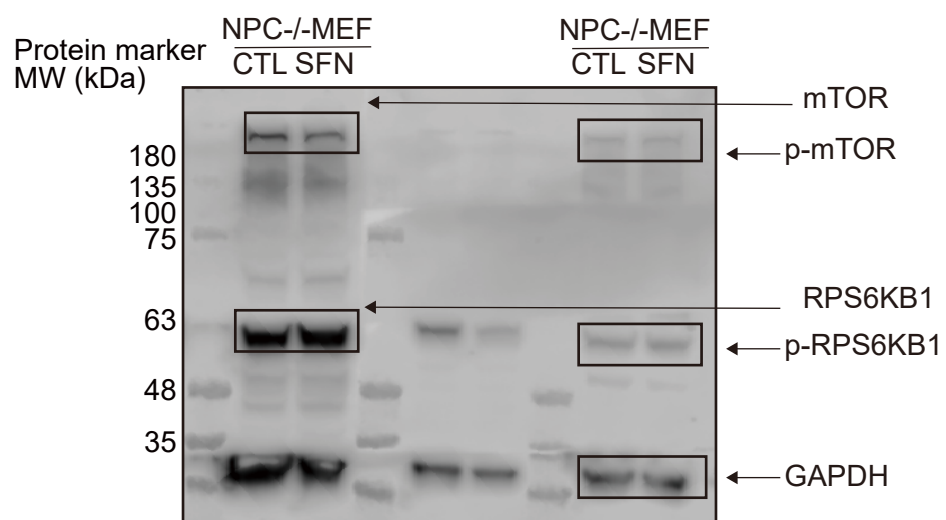

Supplement: fig1-figsupp4-data1 [file elife-103137-fig1-figsupp4-data1-v1.zip]

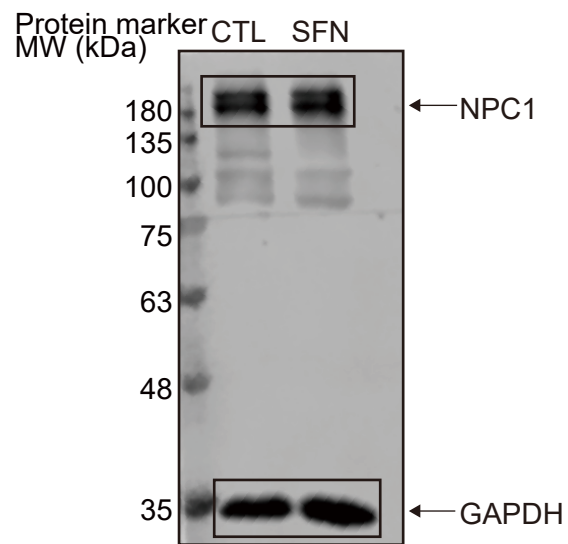

Supplement: fig1-figsupp5-data1 [file elife-103137-fig1-figsupp5-data1-v1.zip]

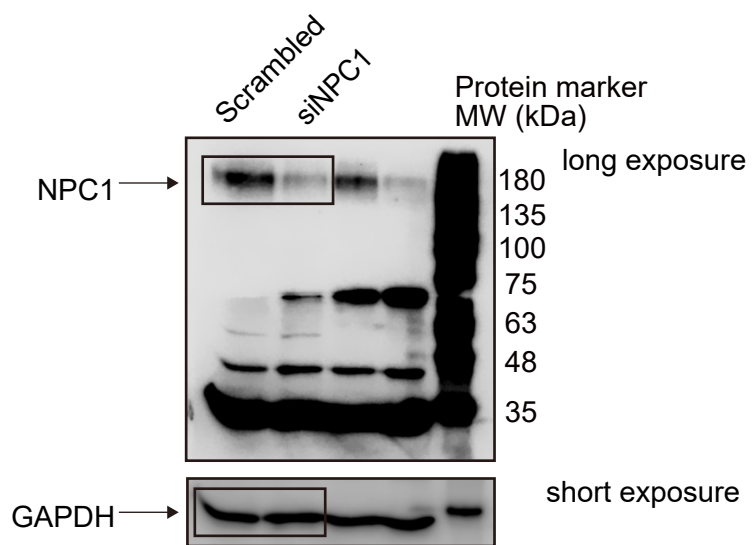

Supplement: fig2-data1 [file elife-103137-fig2-data1-v1.zip]

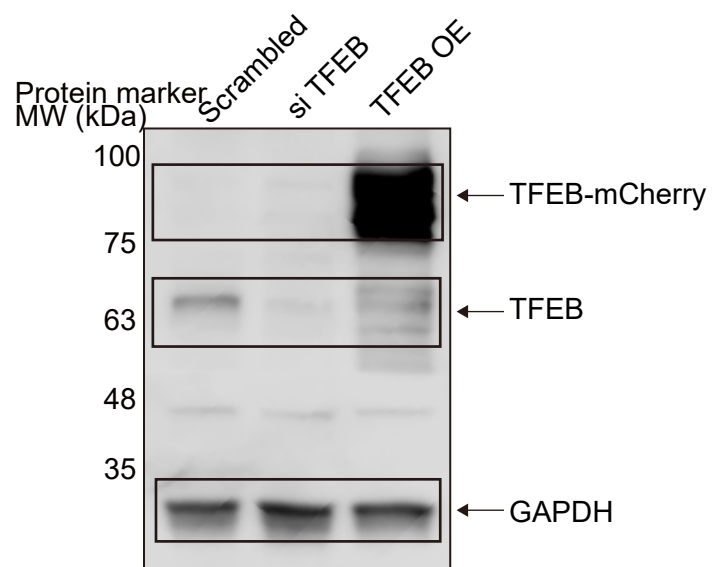

Supplement: fig3-data1 [file elife-103137-fig3-data1-v1.zip]

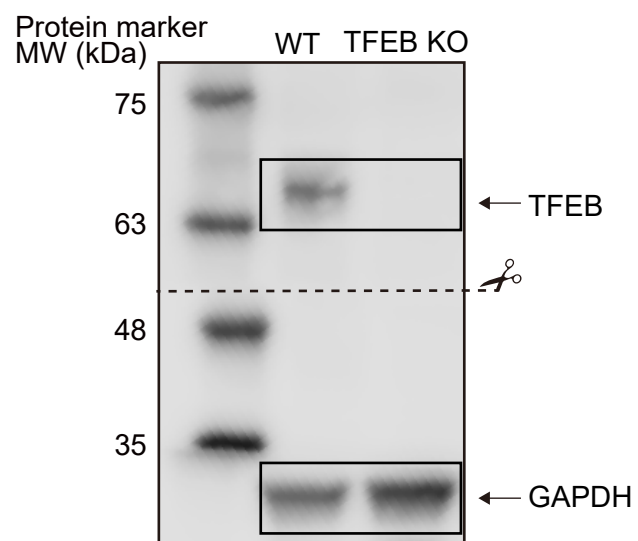

Supplement: fig3-data3 [file elife-103137-fig3-data3-v1.zip]

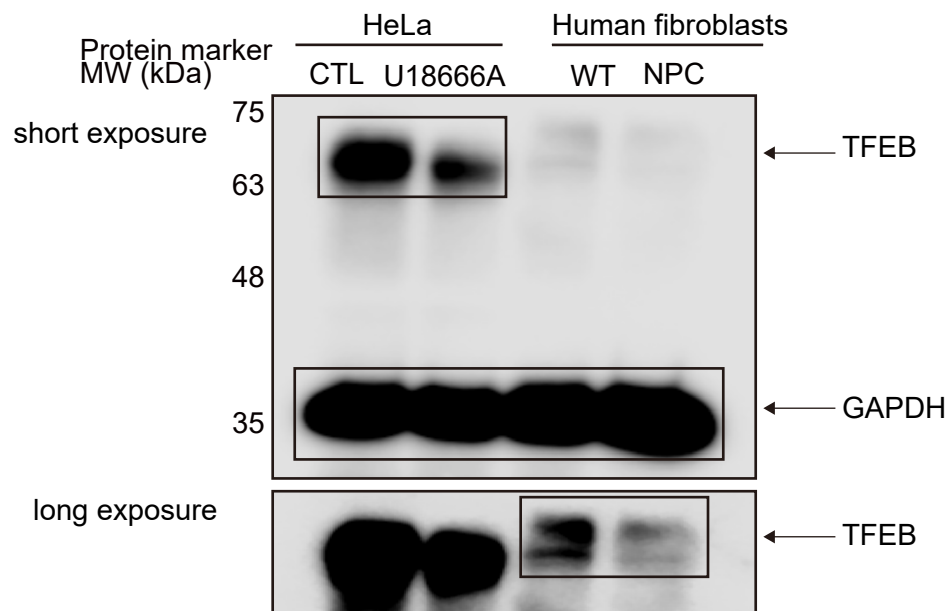

Supplement: fig4-figsupp3-data1 [file elife-103137-fig4-figsupp3-data1-v1.zip]

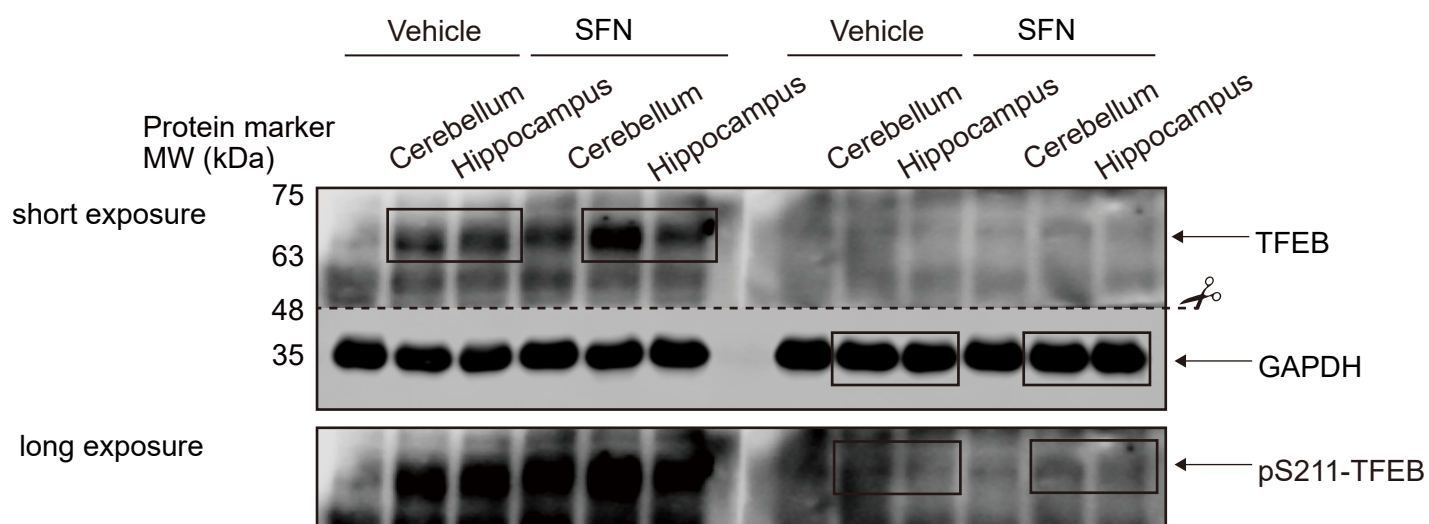

Supplement: fig6-data1 [file elife-103137-fig6-data1-v1.zip]
